# Supplementary material for: Knowledge, attitudes, and practices survey of drug allergy among healthcare practitioners in central China: a multicenter study
Source: PubMed Central journal article supplement — Asia Pac Allergy. 2016 Apr 28;6(2):105–11. doi: 10.5415/apallergy.2016.6.2.105 (PMC4850333; doi:10.5415/apallergy.2016.6.2.105), 2016-04-28
Supplement: apa-6-105-s001.pdf [file apa-6-105-s001.pdf]

## SUPPLEMENTARY MATERIAL

### Supplementary questionnaires

KNOWLEDGE: Below are a series of questions aimed at assessing your knowledge surrounding drug allergy.

#### A1. Drug-induced anaphylaxis belongs to:

- A. Type I hypersensitivity
- B. Type II hypersensitivity
- C. Type III hypersensitivity
- D. Type IV hypersensitivity

#### A2. All of the following factors are related with drug allergy, EXCEPT:

- A. Drug dosage
- B. Drug exposure
- C. Administration route
- D. Heredity

#### A3. Which is the effector cell in drug-induced anaphylaxis?

- A. Mast cells
- B. Lymphocyte
- C. Eosinophils
- D. Monocytes

#### A4. When will immediate drug hypersensitivity reactions occur after drug administration?

- A. <6 hr
- B. 6–8 hr
- C. 8–12 hr
- D. 12–24 hr

#### A5. Which antibody mediates immediate drug hypersensitivity reactions?

- A. IgE
- B. IgG
- C. IgM
- D. IgA

#### A6. What is the most common clinical manifestation of drug allergy?

- A. Anaphylaxis
- B. Cutaneous symptoms

- C. Serum sickness
- D. Hepatic and renal injury

#### A7. What is regarded as the gold standard to diagnosis drug allergy?

- A. Clinical history
- B. Skin tests
- C. Drug-specific IgE
- D. Provocation tests

#### A8. What is the indication of drug provocation test?

- A. Suspected drug allergy
- B. Suspected drug allergy associated with systemic disease
- C. The suspected drug is imperative or cannot be replaced for the concurrent illness
- D. Suspected drug allergy with serious cutaneous symptoms

#### A9. Which test is recommended as the first screening step when immediate drug hypersensitivity reactions were suspected?

- A. Skin prick test
- B. Intradermal test
- C. Skin patch test
- D. Provocation test

#### A10. Which is the appropriate time to perform skin test when drug allergy is suspected?

- A. Anytime
- B. Right after the symptom disappeared
- C. At least one month after the symptom disappeared
- D. Never

#### A11. A 24-year-old male had cough and purulent mucus for 3 days, he had an asthma history. His doctor decided to use penicillin to control the airway infection. In which situation bellowing is not appropriate for the penicillin skin test?

- A. He has been treated with Tylenol (cold medication, including chlorpheniramine, pseudoephedrine, acetaminophen and dextromethorphan) in recent 3 days.
- B. He has been treated with dexamethasone 5 mg by intravenous yesterday.
- C. He has had leukotriene modifier 10 mg/day by PO in recent 3 days.
- D. He has been treated with aminophylline in recent 3 days.

**A12. Which of the following drug is recommended to perform intradermal test before administration?**

- A. Penicillin
- B. Aztreonam
- C. Ofloxacin
- D. Azithromycin

**A13. What is the pivotol management for drug allergy?**

- A. Drug therapy
- B. Specific immunotherapy
- C. Symptomatic therapy
- D. Avoiding sensitization drugs

**A14. Which medication is the first choice when an anaphylactic shock occurred?**

- A. Dopamine
- B. Antihistamine
- C. Glucocorticoid
- D. Epinephrine
